# Supplementary material for: Evaluation of RNF11 as a diagnostic biomarker for gastric cancer through comprehensive TCGA and GEO data mining
Source: Research Square preprint supplement (doi:10.21203/rs.3.rs-7257088/v1), 2025-12-10

**SUPPLEMENTARY MATERIAL**

**Evaluation of RNF11 as a diagnostic biomarker for through comprehensive TCGA and GEO data mining**

Xinyuan Zhou, Minxue Chen, Boxiong Kang,Changjiang Luo*

1 Department of Gastrointestinal surgery, The Second Hospital of Lanzhou University, Lanzhou 730000, China.

*Correspondence author:Changjiang Luo Email addresses: [luocj@lzu.edu.cn](mailto:luocj@lzu.edu.cn)

Keywords: RNF11, Gastric cancer, Molecular diagnosis, Targeted treatment

**supplementary Table** 1. The primer sequence of RNF11 and GAPDH.

| Gene | Primer sequence |
| --- | --- |
| RNF11 | FW: CTGCTTCACGAGTCTCAGTCC |
| RV: TCTTCCAGGGTCATAAACTCCTT |
| GAPDH. | FW: GCACCGTCAAGGCTGAGAAC |
| RV: TGGTGAAGACGCCAGTGGA |

supplementary Table 2. The information of antibody in this study.

| Antibodies | SOURCE | IDENTIFIER |
| --- | --- | --- |
| RNF11 | Abcam | ab154831 |
| RNF11 | Thermofisher | PA5-81252 |
| β-actin | Abcam | ab8227 |
| DAPI | Abcam | ab104139 |

Supplementary Table 3. Enriched result sets

| MSigDB  collection | Name | NES | NOM p-val | FDR q-val |
| --- | --- | --- | --- | --- |
| c5.go.bp.v2022.1.Hs.symbols.gmt | GOBP_BASE_EXCISION_REPAIR | -2.16 | 0.000 | 0.007 |
| GOBP_CELL_MATRIX_ADHESION | 2.33 | 0.000 | 0.000 |
| GOBP_NEGATIVE_REGULATION_OF_BMP_SIGNALING_PATHWAY | 2.38 | 0.000 | 0.000 |
| GOBP_REGULATION_OF_CELLULAR_RESPONSE_TO_GROWTH_FACTOR_STIMULUS | 2.34 | 0.000 | 0.000 |
| c5.go.cc.v2022.1.Hs.symbols.gmt | GOCC_ADHERENS_JUNCTION | 2.07 | 0.000 | 0.005 |
| GOCC_CELL_CELL_JUNCTION | 2.13 | 0.000 | 0.002 |
| GOCC_GTPASE_COMPLEX | 2.11 | 0.000 | 0.003 |
| GOCC_PROTEASOME_COMPLEX | -2.01 | 0.006 | 0.009 |
| c5.go.mf.v2022.1.Hs.symbols.gmt | GOMF_CYTOKINE_BINDING | 2.14 | 0.000 | 0.005 |
| GOMF_GROWTH_FACTOR_BINDING | 2.20 | 0.000 | 0.003 |
| GOMF_TRANSFORMING_GROWTH_FACTOR_BETA_RECEPTOR_BINDING | 2.10 | 0.000 | 0.006 |
| GOMF_UBIQUITIN_PROTEIN_TRANSFERASE_REGULATOR_ACTIVITY | -1.89 | 0.002 | 0.034 |
| c2.cp.kegg.v2022.1.Hs.symbols.gmt | KEGG_HOMOLOGOUS_RECOMBINATION | -2.10 | 0.000 | 0.004 |
| KEGG_CYTOKINE_CYTOKINE_RECEPTOR_INTERACTION | 1.89 | 0.006 | 0.019 |
| KEGG_ECM_RECEPTOR_INTERACTION | 2.32 | 0.000 | 0.000 |
| KEGG_FOCAL_ADHESION | 2.29 | 0.000 | 0.000 |
| KEGG_HEDGEHOG_SIGNALING_PATHWAY | 2.02 | 0.002 | 0.006 |
| KEGG_MAPK_SIGNALING_PATHWAY | 2.04 | 0.000 | 0.006 |
| KEGG_MISMATCH_REPAIR | -1.89 | 0.006 | 0.021 |
| KEGG_PATHWAYS_IN_CANCER | 1.88 | 0.000 | 0.020 |
| KEGG_PROTEASOME | -2.14 | 0.000 | 0.005 |
| KEGG_TGF_BETA_SIGNALING_PATHWAY | 2.16 | 0.000 | 0.001 |
| KEGG_WNT_SIGNALING_PATHWAY | 1.81 | 0.006 | 0.030 |

NES: normalized enrichment score; NOM: nominal; FDR: false discovery rate.

**Supplementary figure1**. Relationship between RNF11 expression levels and clinicopathological data in TCGA datebase


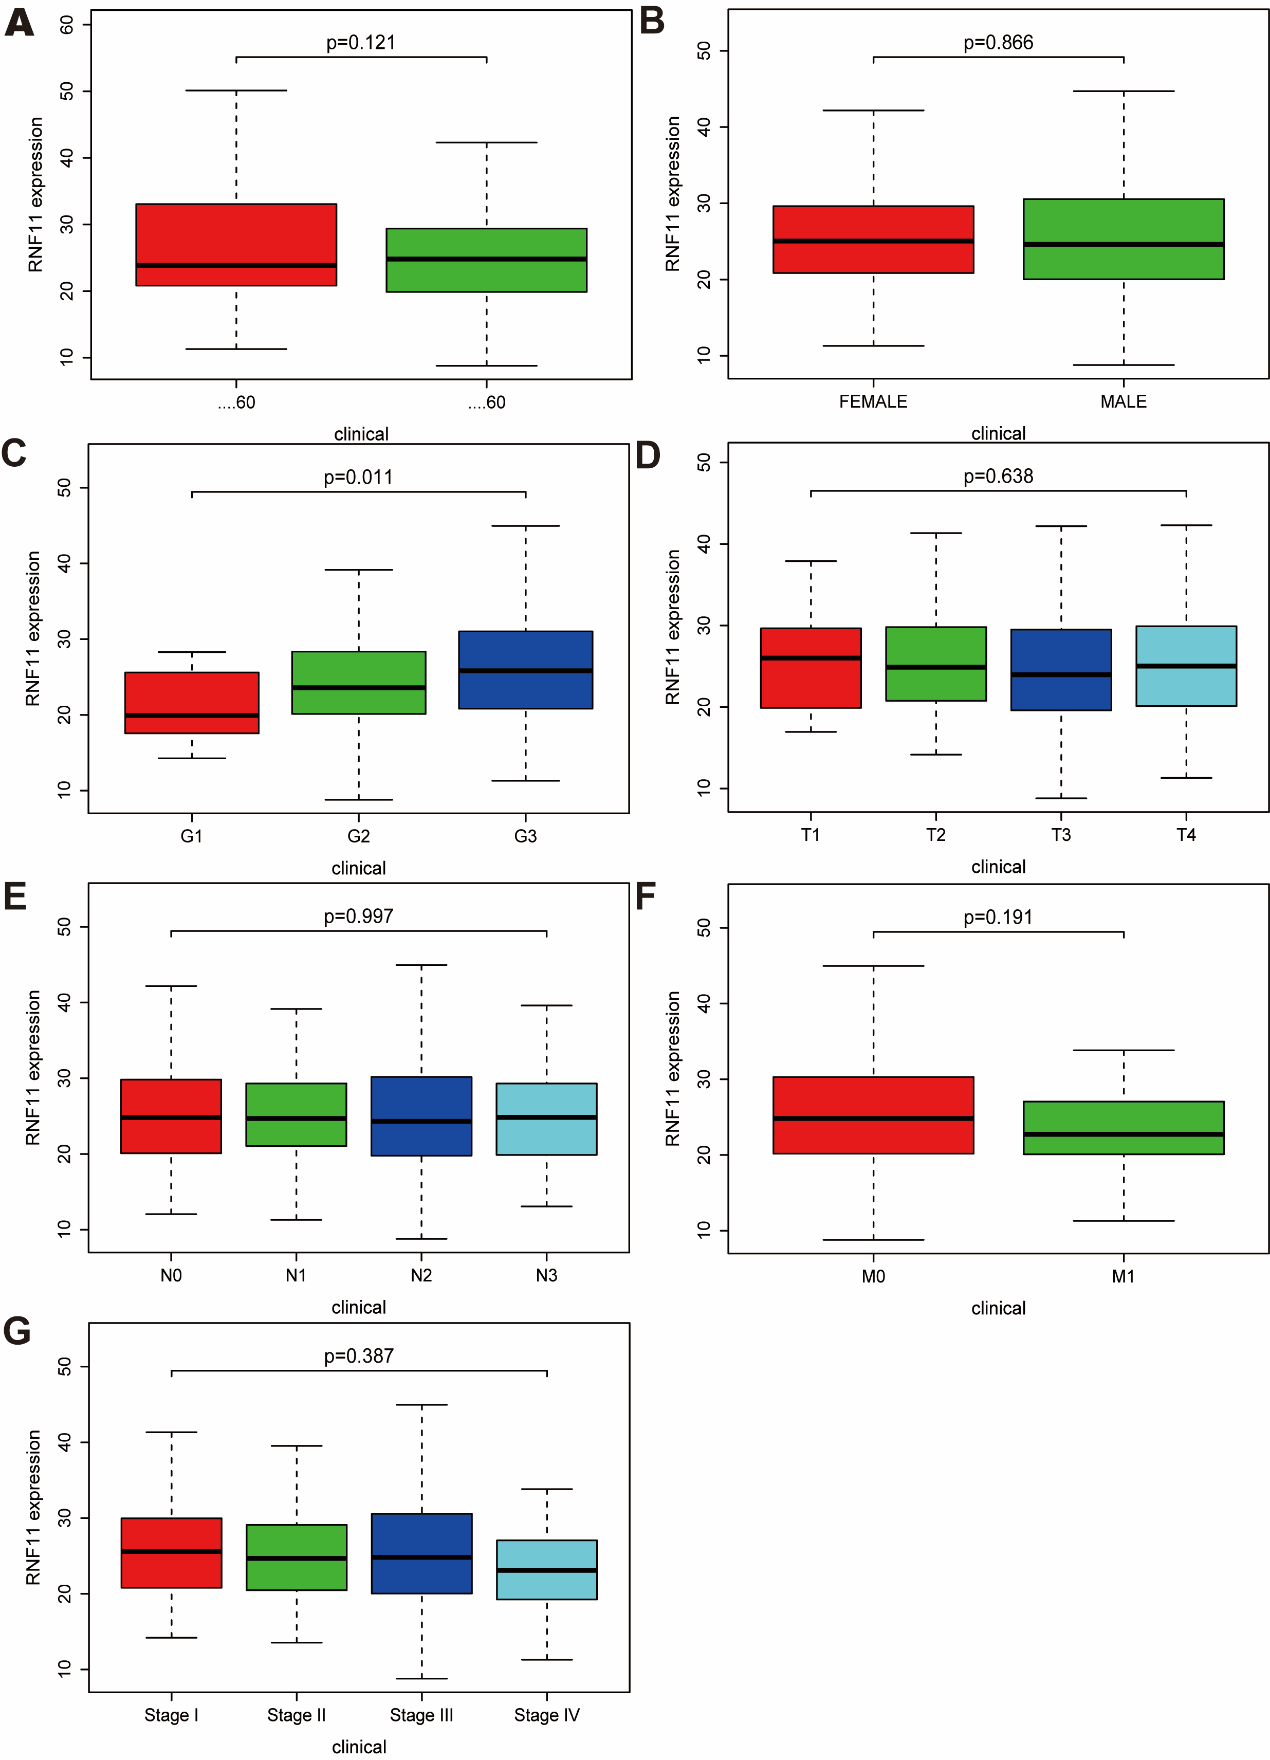

Supplement: Supplementary file 1 [file d4612cdb3989fd3640efb689.docx]
